# Supplementary material for: Degradation of tetrabromobisphenol A by a ferrate(vi)–ozone combination process: advantages, optimization, and mechanistic analysis
Source: Royal Society of Chemistry journal article supplement (doi:10.1039/c9ra07774j), 2019-01-01
Supplement: c9ra07774j1.pdf [file c9ra07774j1.pdf]

## Supplementary data

### Text S1. Toxicity testing methods

#### (1) Acute toxicity

The acute toxicities of water samples were detected with a DeltaTox II luminometer (SDIX, USA), a commercial bioassay according to the ISO standard based on the inhibition of bioluminescence emitted by the luminescent bacteria *V. fischeri*. The specific steps are as follows: Firstly, 310  $\mu\text{L}$  of Micro Tox dilution was added to the luminescent bacteria freeze-dried test tube, which was evenly distributed into 3 test tubes after being cultured for 15 min at room temperature and the initial luminosity ( $E_0$ ) was recorded using the physiological fluid as a blank control. Then, 100  $\mu\text{L}$  of Micro Tox osmotic adjustment solution (OAS) was taken into 1000  $\mu\text{L}$  of water sample to be tested and shaken until uniform to adjust the salinity of the water sample to 3%. Finally, 900  $\mu\text{L}$  of the above water sample was added into the corresponding sequence of luminescent bacteria tubes. The luminosity ( $E$ ) of the water sample was recorded after 5 min of exposure. The pH of the water sample was adjusted to neutral before the test and the test temperature was controlled at  $20\pm 5$  °C. The 15 min EC50 of the quality control reference poison  $\text{HgCl}_2$  to the luminescent bacteria was 0.08~0.12 mg/L. The acute toxicity of the water sample was expressed by the relative luminosity inhibition rate ( $T\%$ ). The calculation formula was as shown in the following formula:

$$T\% = \frac{E_0 - E}{E_0} 100\%$$

Where  $E_0$  and  $E$  represent the normalized bioluminescence intensities of the control and the water sample. The greater the value of  $T\%$ , the higher the acute toxicity of the water sample.

#### (2) Chronic toxicity

The chronic toxicities of samples were detected by the standard method of *D. magna* 21 d chronic toxicity test following OECD guidelines. The maximum non-observed effect concentration (NOEC) was obtained to express the chronic toxicity effect. The specific steps are as follows. Firstly, the pre-test was carried out, through which the water sample was diluted to different concentration gradients and 2~3 parallels was set for each concentration. The 400 mL crystallized dish was used and equipped with 250~300 mL test solution and 10 *D. magna*. Each test liquid was set up with a blank control containing an equal volume of dilution water. The mortality of *D. magna* for each container was recorded after 24 hours of the test, which taken the heartbeat stop of *D. magna* as the end point of the test. According to the result of the pre-test, the 24 h half lethal concentration LC50 of water sample to *D. magna* was obtained. Then, 4~5 concentration gradients were set in the range of 0.01~0.5 times LC50 water sample concentration, and 10 parallels were set for each concentration. The aerated dechlorination tap water was used as the blank control. 1 *D. magna* was put in the 25 mL water sample or tap water, and was cultured for 21 days in an incubator with a light to dark ratio of 16:8 and 25 °C. Feed water every two days and record the survival of *D. magna* every day. At the end of the trial, the mortality of *D. magna* in the blank control was not more than 10% as effective. In the 21 d culture process, the maximum non-effect concentration NOEC of the water sample in the test group for *D. magna* was obtained as compared with the control group. The chronic toxicity equivalent of the water sample to *D. magna* was obtained according to the calculation formula  $TU=100\%/NOEC$ .

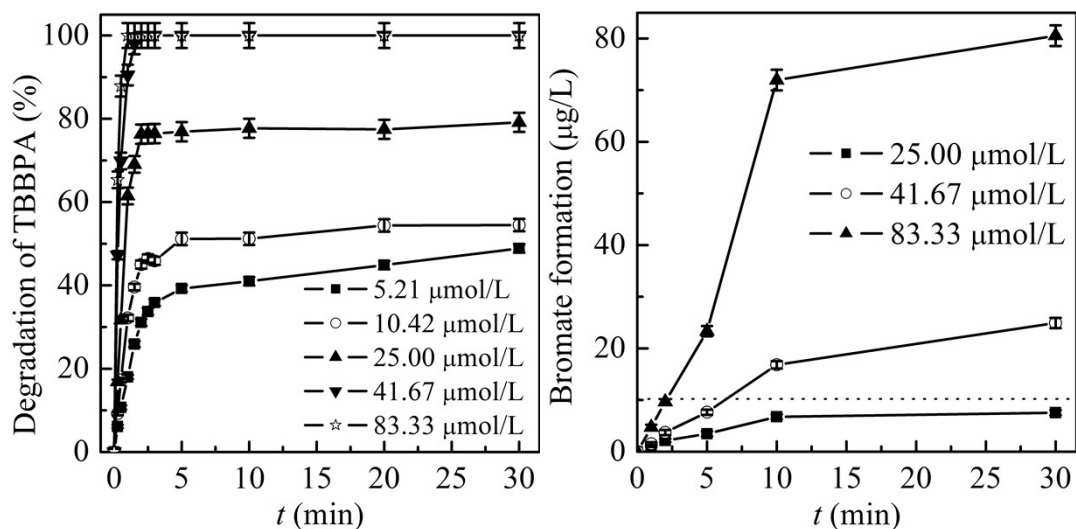

**Fig. S1.** Degradation of TBBPA by sole ozonation and bromate formation. (Experimental conditions: ozone dosage= 5.21, 10.42, 25.00, 41.67, 83.33  $\mu\text{mol/L}$ ;  $[\text{TBBPA}]_0 = 1.84 \mu\text{mol/L}$ ; initial pH= 7.0; temperature= 25  $^\circ\text{C}$ .)

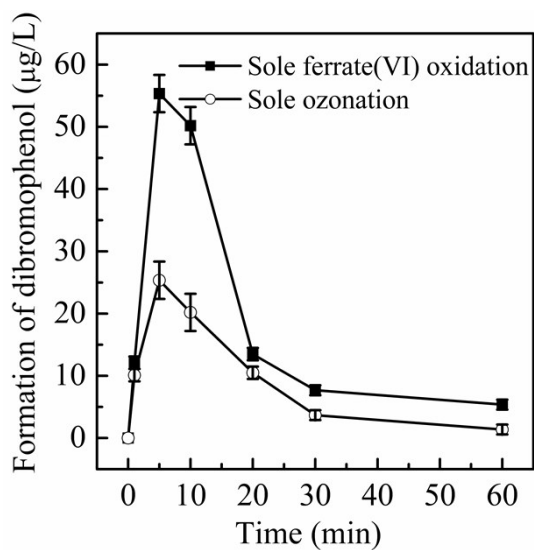

**Fig. S2.** Formation of dibromophenol 4 during degradation of TBBPA (Experimental conditions: TBBPA concentration= 1.84  $\mu\text{mol/L}$ ; ferrate(VI) concentration= 0.51  $\mu\text{mol/L}$ ; ozone concentration= 0.51  $\mu\text{mol/L}$ ; initial solution pH= 7.0; temperature= 25 $\pm$ 0.5  $^\circ\text{C}$ )
